1  
2  
3  
4  
5  
6  
7  
8  
9  
10  
11  
12  
13  
14  
15  
16  
17  
18  
19  
20  
21  
22

# ***Nr5a1* suppression during the fetal period optimizes ovarian development by fine-tuning of Notch signaling**

Risa Nomura<sup>1¶</sup>, Kenichi Kashimada<sup>1\*</sup>, Hitomi Suzuki<sup>2</sup>, Liang Zhao<sup>3</sup>,  
Atusmi Hosokawa-Tsuji<sup>1</sup>, Hideo Yagita<sup>5</sup>, Masatoshi Takagi<sup>1</sup>, Yoshiakira Kanai<sup>4</sup>, Josephine  
Bowles<sup>3</sup>, Peter Koopman<sup>3</sup>, Masami Kanai-Azuma<sup>2</sup>, Tomohiro Morio<sup>1</sup>

<sup>1</sup>Department of Pediatrics and Developmental Biology, Tokyo Medical Dental University,  
Tokyo, Japan

<sup>2</sup>Department of Experimental Animal Model for Human Disease, Graduate School of Medical  
and Dental Science, Tokyo Medical and Dental University, Tokyo, Japan

<sup>3</sup>Institute for Molecular Bioscience, The University of Queensland, Brisbane, Australia

<sup>4</sup>Department of Veterinary Anatomy, The University of Tokyo, Tokyo, Japan

<sup>5</sup>Department of Immunology, Juntendo University School of Medicine, Tokyo, Japan.

\*Author for correspondence: Kenichi Kashimada

Tel: +81 3 5803-5249

Fax: +81 3 5803-5246

Email: [kkashimada.ped@tmd.ac.jp](mailto:kkashimada.ped@tmd.ac.jp)

Running title: NR5A1 suppresses Notch signaling during ovarian development

24 **ABSTRACT**

25

26 The nuclear receptor NR5A1 (also known as Ad4BP, or SF1) is essential for the initial steps  
27 of mammalian gonadal development. The *Nr5a1* gene is equally expressed in XX and XY  
28 gonadal primordia, but after sex determination, is up-regulated in XY and down-regulated in  
29 XX gonads. We recently reported a case of 46, XX disorder of sex development (DSD) in  
30 which ectopically expressed NR5A1 in XX gonads led to an ovo-testicular phenotype,  
31 suggesting that excess NR5A1 can direct the development of immature XX gonads towards  
32 testicular formation. However, a direct causal relationship has not been demonstrated in an  
33 animal model. Here, using a Wt1-BAC (bacterial artificial chromosome) transgene system,  
34 we generated two lines of mice overexpressing *Nr5a1* in the fetal gonads at different levels.  
35 One of these lines (Tg-S), highly expressing *Nr5a1*, revealed that enforced *Nr5a1* expression  
36 alone is insufficient to switch the fate of the 46,XX gonads toward testicular formation in  
37 mice. In the other line (Tg-A) expressing *Nr5a1* at lower level, ovarian development was  
38 compromised, with multi-oocyte follicles, reduced number of matured follicles, and impaired  
39 expression of *Wnt4*, resulting in late onset infertility at 20 weeks after birth. The phenotype  
40 was similar to that of genetically modified mice with impaired Notch signaling. Indeed, the  
41 expression level of *Notch2* and *3* was significantly reduced in Tg-A mice, and the ovarian  
42 phenotype in Tg-A mice was almost completely rescued by in utero treatment with a *Notch2*  
43 agonist HMN2-29. We conclude that suppression of *Nr5a1* during the fetal period optimizes  
44 ovarian development by fine tuning of Notch signaling levels.

45 (257 words)

46

47 **AUTHOR SUMMARY**

48 Sexual development is a process of differentiation from undifferentiated bipotential gonads,  
49 and insight into sexual differentiation will bring important new knowledge to our

50 understanding of organogenesis. The nuclear receptor NR5A1 which is essential for  
51 mammalian gonadal development, is equally expressed in both gonadal primordia, but after  
52 sex determination, is up-regulated in XY and down-regulated in XX gonads. We have  
53 recently demonstrated that this down-regulation is mediated by ovarian transcription factor,  
54 Forkhead box L2 (FOXL2). This finding raised two key questions, whether Nr5a1 can  
55 function as a male sex-determining factor, and whether the repression is essential for  
56 appropriate ovarian development. By generating two lines Tg mice in XX gonads with  
57 different enforced expression levels of Nr5a1, our present study revealed that alterations in  
58 Nr5a1 dosage, either reduced or excessive, result in pathological effects in ovarian  
59 development and female fertility, indicating that the precise control of Nr5a1 at the  
60 transcriptional level is essential for optimal ovarian development. We envisage that the  
61 improved understanding of how this pathway regulates ovarian development and female  
62 fertility would aid the development of artificial somatic ovarian cells, which in turn may  
63 provide a valuable treatment option in reproductive medicine.

64

65 **ABBREVIATIONS**

66 BAC: bacterial artificial chromosome

67 dpc: days post coitum

68 FOXL2: Forkhead box L2

69 HSD: hydroxysteroid dehydrogenase

70 IF: Immunofluorescence

71 MOFs: multiple oocyte follicles

72 PFA: paraformaldehyde

73 qRT-PCR: Quantitative real-time PCR

74 Rps29: Ribosomal protein S29

75 SRY: sex-determining region Y

76

77

## 1 INTRODUCTION

2

3 NR5A1, also known as Ad4BP or SF1, is a member of the nuclear receptor superfamily. In  
4 mice, *Nr5a1* is expressed from about 9.5 days *post coitum* (dpc), in the anlagen of the gonads  
5 and the adreno-genital primordium [1], and knockout models show complete gonadal agenesis  
6 in both XX and XY, suggesting that NR5A1 is essential for genital ridge development in both  
7 sexes [2] [3]. In addition to initiating gonadal development, NR5A1 plays crucial roles in  
8 testicular development. It is transcriptionally up-regulated in the developing mouse testes [4],  
9 where it acts as a cofactor of the male sex-determining factor SRY (sex-determining region  
10 Y) to induce *Sox9* expression [5]. Subsequently, it cooperates with SOX9 to maintain the  
11 expression of *Sox9* itself [5] and up-regulate other Sertoli cell-specific genes, including *AMH*  
12 (De Santa Barbara et al., 1998). Furthermore, NR5A1 is essential for the differentiation of the  
13 testicular steroidogenic cells, fetal Leydig cells [6]. Consistent with its essential roles in testis  
14 differentiation, heterozygous loss-of-function mutations in *NR5A1* cause XY female sex  
15 reversal in humans [7-10].

16

17 In contrast to its transcriptional up-regulation in fetal testes, *Nr5a1* expression in mouse fetal  
18 ovaries decreases after 12.5 dpc [1]. We have recently demonstrated that this down-regulation  
19 is mediated by Forkhead box L2 (FOXL2), a key ovarian transcription factor expressed  
20 mainly in pregranulosa/granulosa cells [11]. FOXL2 directly binds to the proximal promoter  
21 of *Nr5a1*, thereby antagonizing the actions of WT1-KTS. Given the highly conserved  
22 sequence for FOXL2 binding, this regulatory mechanism may be maintained in other  
23 eutherian mammals [11]. Based on these observations, we hypothesized that adequate  
24 suppression of *Nr5a1* may be essential for normal ovarian development. However, the  
25 biological relevance of *Nr5a1* suppression during fetal ovarian development has not been  
26 clarified.

1  
2 Recently, we and others have reported 46,XX testicular or ovo-testicular DSD individuals  
3 carrying mutations in codon 92 of *NR5A1*, including the R92W and R92Q mutations [12-16].  
4 The variant protein was thought to function in the XX gonads by escaping the suppressive  
5 action of NR0B1 (DAX-1), a pro-ovary factor [13, 16, 17]. The presence of testicular tissue in  
6 the probands further suggested that ectopic activity of NR5A1 may drive testis differentiation  
7 in the absence of the *SRY* gene.

8  
9 These observations raised two key questions. Firstly, it is not clear whether *Nr5a1* can  
10 function as a male sex-determining factor, i.e., whether elevated *Nr5a1* expression levels in  
11 XX gonads where the male determining gene *Sry* is absent, are sufficient to direct the fate of  
12 gonads towards testicular development. Secondly, it is not known whether repression of  
13 *Nr5a1* is essential for appropriate ovarian development.

14  
15 To address these questions, we exploited a BAC (bacterial artificial chromosome) transgene  
16 system [18] whereby *Nr5a1* expression is driven by *Wtl* regulatory sequences. In the fetal XX  
17 gonads, endogenous *Wtl* is expressed in supporting cells including pre-granulosa cells and  
18 coelomic epithelium [19-21]. Hence, by directing transgenic *Nr5a1* expression to *Wtl*-  
19 expressing XX gonadal supporting cells, we aimed to investigate the consequence of *Nr5a1*  
20 overexpression in the relevant cell types in XX mouse fetal gonads. Molecular and phenotypic  
21 analysis of the two transgenic mouse lines generated demonstrated, firstly, that enforced  
22 *Nr5a1* expression alone is insufficient to switch the fate of the 46,XX gonads toward  
23 testicular formation in mice and, secondly, that overexpression of NR5A1 disrupts ovarian  
24 follicular development and causes premature ovarian insufficiency by dysregulating levels of  
25 Notch signaling, which is known to be important for ovarian development and function.

26

## 1 RESULTS

2

### 3 **Overexpression of *Nr5a1* fails to cause XX sex reversal in mice**

4 Using the piggyBac-enabled *Wtl*-BAC system [18] (Fig. 1A), we successfully generated two  
5 transgenic mouse lines (Tg-A and Tg-S) expressing an *Nr5a1*-IRES-*Egfp* transgene at  
6 different levels (Fig. 1B–M). Using quantitative reverse transcriptase PCR (qRT-PCR) we  
7 found that XX Tg-S fetal gonads expressed *Nr5a1* at almost the same level as that in wild  
8 type testes, whereas the XX Tg-A gonads expressed *Nr5a1* at levels between those in wild  
9 type testes and ovaries (Fig. 1N). We confirmed histologically that the kidneys and adrenal  
10 glands, expressing endogenous *Wtl* at high levels, developed no apparent abnormalities in  
11 either Tg-A or Tg-S mice, suggesting that the gonadal phenotypes of the transgenic mice were  
12 unlikely to be caused by the impaired function of those organs.

13

14 In both Tg-A and Tg-S lines, XX mice developed female internal and external genitalia (Fig.  
15 2A–F). Morphologically, the gonads in adult XX Tg-S mice were streak-like and elongated  
16 (Fig. 2F,J). In Tg-A mice, fetal ovaries were longer and thinner than wild type (Fig. S1A–D),  
17 However, the elongation of the gonads resolved by P0. Since a similar phenotype was  
18 reported in *Sox4*<sup>-/-</sup> mice [22], we examined the expression levels of *Sox4* in the XX Tg-A  
19 gonads at 15.5 dpc and indeed found significantly reduced expression of *Sox4* (Fig. S1E),  
20 suggesting that elevated NR5A1 repressed *Sox4* resulting in abnormal morphology of the fetal  
21 ovaries.

22

23 In both transgenic lines, histological examination of XX adult gonads revealed the presence of  
24 ovarian follicles but detected no seminiferous tubule-like structures (Fig. 2G–J). Consistently,  
25 FOXL2, a marker of ovarian granulosa cells, was expressed in XX adult gonads in both  
26 mouse lines (Fig. 2L, M). In contrast, SOX9, a marker of testicular Sertoli cells, was not

1 detected (Fig. 2P, Q). Based on these data, we conclude that *Nr5a1* overexpression alone is  
2 insufficient to cause XX sex reversal in mice.

3

#### 4 **Presence of ectopic steroidogenic cells in fetal ovaries of *Nr5a1*-transgenic mice**

5 In addition to Sertoli cells, NR5A1 is highly expressed in gonadal steroidogenic cell lineages  
6 in both sexes and is essential for their differentiation (Buaas Swain, Development 2012) [23,  
7 24]. In the males, steroidogenic Leydig cells differentiate during fetal testis development and  
8 produce androgen [25]. In contrast, the ovarian steroidogenic theca cells do not differentiate  
9 until after birth [25-27]. We asked whether overexpression of *Nr5a1* is able to induce the  
10 ectopic differentiation of steroidogenic cells in fetal XX gonads. Immunofluorescence  
11 analysis of the XX fetal gonads of Tg-A and Tg-S mice (Fig. 3A–L) revealed that 3 $\beta$ -  
12 hydroxysteroid dehydrogenase (3 $\beta$ -HSD), the enzyme mediating the first step of  
13 steroidogenesis and a marker of steroidogenic cells [28], was detected in the Tg-S XX gonads  
14 (Fig 3G). However, the plasma testosterone and estradiol levels at P0 were not elevated in XX  
15 Tg-S mice compared to wild type (Fig. 3M, N). This is consistent with the lack of  
16 masculinization in XX Tg-S mice (Fig. 2C,F).

17

#### 18 **Enforced expression of *Nr5a1* leads to increased follicular atresia and impaired fertility**

19 Histological examination of Tg-A and Tg-S ovaries revealed increased number of multiple  
20 oocyte follicles (MOFs) (Fig. 4A–D), suggesting a disruption of ovigerous cord fragmentation.  
21 Further, we found that the numbers of antral follicles (type 6–8) decreased significantly in  
22 both transgenic lines compared to wild type (Fig. 4E). The numbers of antral follicles  
23 appeared to be inversely correlated with *Nr5a1* expression levels, with the Tg-S ovaries  
24 containing fewer antral follicles than the Tg-A ovaries (Fig. 4E). To determine whether this  
25 was caused by reduced proliferation or increased apoptosis of follicular granulosa cells, we  
26 analysed the expression of Ki-67, a maker of proliferating cells, and cleaved Caspase 3, a



1 marker of apoptotic cells, in the transgenic ovaries at P28. We observed no obvious changes  
2 in the follicles containing Ki-67-positive granulosa cells (Fig. 4J-L), but a significant increase  
3 in secondary follicles (type 4 and 5) containing cleaved Caspase 3-positive granulosa cells in  
4 both Tg-A and Tg-S ovaries (Fig. 4F, G-I, M-O). The increase in follicular atresia correlated  
5 with *Nr5a1* expression levels, with Tg-S ovaries exhibiting higher levels of atresia than Tg-A  
6 ovaries (Fig. 4F,G-I,M-O). No increase in type 6 antral follicles containing cleaved Caspase  
7 3-positive cells was observed (Fig. 4F). Together, these results suggest that overexpression of  
8 *Nr5a1* caused increased apoptosis of granulosa cells in secondary follicles in a dose-  
9 dependent manner, resulting in reduced numbers of antral follicles.

10

11 We next assessed the fertility of Tg-A and Tg-S female mice. Tg-S female mice were almost  
12 infertile. Of three Tg-S females analyzed, the litter size was reduced from their first mating  
13 (Fig. 4P). The reproductive performance of Tg-A females was also reduced. Although Tg-A  
14 mice produced four consecutive litters to begin the study, they failed to produce additional  
15 litters thereafter (Fig. 4Q), suggesting that these females underwent premature ovarian  
16 insufficiency.

17

### 18 ***Nr5a1* overexpression represses Notch signaling levels in fetal ovaries**

19 Interactions between germ cells and somatic pregranulosa cells are crucial for the formation  
20 of ovarian follicles, and Notch signaling plays a major role in mediating this interaction [29-  
21 31]. In the developing ovaries, oocytes and other neighbouring cells secrete the Notch ligands,  
22 including JAG1 and possibly JAG2, which bind to Notch receptors (mainly NOTCH2)  
23 present on the surface of pre-granulosa cells, thereby activating Notch signaling [32]. As a  
24 result, pre-granulosa cells proliferate and encapsulate individual germ cells to form primordial  
25 follicles, i.e., the resolution of germ cell syncytia [30]. Genetic ablation of either *Jag1* or  
26 *Notch2*, two important Notch pathway components, gives rise to MOFs and causes premature

1 reproductive senescence [29]. Because of the similarity in the phenotypes between our *Nr5a1*  
2 transgenic mice and *Jag1*- or *Notch2*-deficient mice, we hypothesized that enforced  
3 expression of *Nr5a1* may compromise ovarian development by repressing the Notch signaling  
4 pathway.

5  
6 We therefore analysed mRNA expression levels of a number of genes involved in Notch  
7 signaling in 15.5-dpc fetal ovaries using qRT-PCR (Fig. 5 A~H). Supporting our hypothesis,  
8 we found significant down-regulation of several Notch pathway genes, including *Notch2*,  
9 *Notch3* and *Dll4*, in Tg-A ovaries compared with wild-type ovaries (Fig. 5B, C, H).

10

#### 11 **A Notch2 agonist rescues the ovarian phenotype in Tg-A mice**

12 To further clarify the contribution of Notch signaling to the ovarian phenotype in *Nr5a1*  
13 transgenic mice, we attempted a rescue experiment with a Notch2 agonist HMN2-29, a  
14 hamster monoclonal antibody [33]. We injected three doses of HMN2-29 or control hamster  
15 IgG intraperitoneally into pregnant mice carrying wild-type or Tg-A fetuses at 13.5, 16.5 and  
16 18.5 dpc (Fig. S2A), and analysed the ovaries postnatally (P14 and P28). No obvious adverse  
17 effects of *in utero* administration of the Notch2 agonist were observed, as the treated mice  
18 appeared grossly normal with body weight comparable to wild type at P28 (Fig. S2B).

19

20 Confirming our hypothesis, we found reduced number of MOFs in Tg-A mice at P14 upon  
21 HMN2-29 treatment (Fig. 6A). Moreover, treatment with the NOTCH2 agonist completely  
22 rescued the numbers of antral follicles in the Tg-A ovaries at P28 (Fig. 6B). The complete  
23 rescue of antral follicle numbers appeared to be a result of reduced atresia of secondary  
24 follicles in the treated ovaries (Fig. 6C-O). These results suggest that *Nr5a1* fine-tunes Notch  
25 signaling levels in fetal ovaries to ensure proper folliculogenesis and normal fertility, and that

1 repression of *Nr5a1* during fetal ovarian development is essential to allow the Notch signaling  
2 levels to elevate appropriately.

3

4 We further explored molecular mechanisms by which the Notch signaling pathway regulates  
5 fetal ovarian development. To this end, we analysed expression levels of two master  
6 regulators of ovarian development, *Wnt4* and *Foxl2*, in the Tg-A ovaries at P0. We found that  
7 *Wnt4*, but not *Foxl2*, was significantly down-regulated in Tg-A mice compared to wild type  
8 (Fig. 6P, Q). Importantly, *Wnt4* expression in the Tg-A ovaries were fully restored by the  
9 administration of HMN2-29 (Fig. 6Q), suggesting that down-regulated *Wnt4* expression was a  
10 result of de-regulated Notch signaling pathway rather than a direct effect of NR5A1  
11 overexpression. We note that this regulatory relationship is likely limited to the late-stage  
12 fetal ovaries, as expression of the Notch pathway genes starts in fetal ovaries from about 15.5  
13 dpc [29].

14

1 **DISCUSSION**

2

3 *Nr5a1* plays known essential roles in the development of genital ridges in both sexes and fetal  
4 testes in the male. We show in the present study that it also plays an important role in fetal  
5 ovarian development by fine-tuning the levels of Notch signaling.

6

7 **Overexpression of *Nr5a1* alone is insufficient to drive testis determination and**  
8 **differentiation in mice**

9 Of the two transgenic lines generated, the Tg-S line, expressed *Nr5a1* in the XX gonads at  
10 levels comparable to that in wild-type testes. Nevertheless, XX mice of the Tg-S line  
11 developed female internal and external genitalia. We presume that NR5A1 may play different  
12 roles with respect to sex determination in humans and mice, and wild-type NR5A1 may not  
13 possess the ability to drive testis differentiation on its own in mice. Consistently, XX mice  
14 carrying heterozygous or homozygous R92W mutation in *Nr5a1* showed no signs of  
15 masculinization [13], supporting that NR5A1 (and the R92W mutant) may function  
16 differently in humans and mice. The differences between humans and mice regarding the  
17 molecular mechanisms of sex determination and gonadal development have been documented  
18 in several cases. For example, duplication of *DAX-1* (*NR0B1*), an orphan nuclear receptor  
19 gene, causes XY female sex reversal in humans [34], whereas transgenic overexpression of  
20 *Dax1* in mice does not normally cause female sex reversal [17]. Since a major function of  
21 DAX1 is to antagonize NR5A1 [1, 34-36], it is conceivable that NR5A1 also plays a species-  
22 specific role in sex determination.

23

24 **NR5A1 promotes fetal Leydig cell differentiation by restricting Notch signaling**

25 Our results reveal a novel function of NR5A1 in the negative regulation of the Notch  
26 signaling pathway during fetal ovarian development. In addition to its critical functions in

1 ovarian development, Notch signaling also plays a pivotal role in fetal testis development,  
2 particularly in the differentiation of fetal Leydig cells. Notch signaling restricts fetal Leydig  
3 cell differentiation by promoting and maintaining the progenitor cell fate [37]. Interestingly,  
4 NR5A1 has been suggested to promote fetal Leydig cell differentiation by suppressing Notch  
5 signaling in this context [38].

6  
7 Consistent with these reports, we found that overexpression of NR5A1 in the fetal ovaries of  
8 Tg-S mice led to the differentiation of 3 $\beta$ -HSD positive cells, presumably ectopic fetal Leydig  
9 cells, at 15.5 dpc. However, the presence of these cells did not lead to an increase in plasma  
10 testosterone levels at birth. There may be too few 3 $\beta$ -HSD positive cells in the transgenic  
11 ovaries: this is borne out by the fact we did not find significant elevation of *Hsd3b* gene  
12 expression in the Tg-S fetal ovaries by qRT-PCR analysis (data not shown). A recent report  
13 revealed that fetal Leydig cells do not have the capacity to produce testosterone because they  
14 do not express 17 $\beta$ -hydroxysteroid dehydrogenases (17 $\beta$ -HSD), essential for the last step of  
15 testosterone synthesis [24, 39]. Hence, although some ectopic 3 $\beta$ -HSD-positive presumptive  
16 fetal Leydig cell differentiation occurred in the Tg-S mice, the absence of Sertoli cells  
17 expressing 17 $\beta$ -HSD (which convert androstenedione to testosterone) means that no  
18 testosterone can be produced.

19

20

### 21 **Fetal gonadal development requires optimal levels of *Nr5a1* and Notch signaling**

22 Based on our and published data, we propose a model of NR5A1 function in fetal gonadal  
23 development (Fig. 7). The sexually dimorphic expression pattern of *Nr5a1* in the developing  
24 fetal gonads allows the Notch signaling activity to be tuned to optimal levels to suit distinct  
25 developmental programs. In fetal ovaries, downregulated *Nr5a1* de-represses Notch signaling,  
26 thereby allowing appropriate follicular development. On the other hand, elevated levels of

1 NR5A1 in fetal testes represses Notch signaling, allowing fetal Leydig cells to differentiate.  
2 In ovarian development, the regulation of Notch signaling by NR5A1 may be context-  
3 dependent and limited to the fetal stage, since the mRNA levels of *Notch2/3* and *Nr5a1* are  
4 known to simultaneously increase after birth [29, 40].

5  
6 Our model suggests that an optimal level of *Nr5a1* in fetal ovaries is required for proper  
7 development of follicles, and that either insufficient or excessive *Nr5a1* expression in fetal  
8 ovaries leads to impaired ovarian development. Consistent with this model, *Cited2*-null mice  
9 with severely reduced *Nr5a1* expression in fetal ovaries showed impaired expression of  
10 several ovarian marker genes [41], suggesting that low levels of *Nr5a1* expression are  
11 required for ovarian development. Similarly, women carrying loss-of-function mutation in  
12 *NR5A1* often develop premature ovarian insufficiency [42]. On the other hand, mild  
13 upregulation of *Nr5a1* expression in Tg-A mice was sufficient to impair follicular  
14 development and female fertility, even though the increase in expression was very mild  
15 compared to wild-type ovaries.

16  
17 In summary, our study provides novel insight into the molecular pathways regulating fetal  
18 ovarian development, about which little is currently understood. We show that insufficiently  
19 repressed *Nr5a1* during fetal ovarian development leads to compromised follicular  
20 development and fertility issues due to dysregulated Notch signaling. Alterations in *Nr5a1*  
21 dosage, either reduced or excessive, result in pathological effects in ovarian development and  
22 female fertility, indicating that the precise control of *Nr5a1* at the transcriptional level is  
23 essential for optimal ovarian development. Further studies are required to reveal molecular  
24 details of the NR5A1-Notch-WNT4 axis in fetal ovarian development. We envisage that the  
25 improved understanding of how this pathway regulates ovarian development and female

1 fertility would aid the development of artificial somatic ovarian cells, which in turn may  
2 provide a valuable treatment option in reproductive medicine.

3

## 4 **MATERIALS AND METHODS**

5

### 6 **Generating transgenic mice**

7 The mouse transgenesis procedure was based on a protocol described previously [18]. Briefly,  
8 a sequence containing the mouse *Nr5a1* coding region followed by an internal ribosomal  
9 entry site and the sequence encoding enhanced green fluorescent protein (*Nr5a1-IRES-Egfp*)  
10 was cloned into the PBWt1-Dest vector via Gateway LR recombination (Fig. 1A). Transgenic  
11 founder mice were produced by pronuclear injection of the PBWt1-*Nr5a1-IRES-Egfp* vector  
12 DNA and hyperactive piggyBac transposase mRNA as described. The XY male founders  
13 mated with BDF1 females, and transmitted the transgene through the germ line. For  
14 subsequent analyses, we chose two lines, Tg-A and Tg-S. Both lines were maintained by  
15 mating F0 or F1 XY transgenic male mice with BDF1 wild type females. Genotyping and  
16 sexing was performed by PCR (primer sequences provided in Supplementary Table S1) using  
17 genomic DNA prepared from tail or ear biopsies. All animal procedures were approved by the  
18 Institutional Animal Care and Use Committee of Tokyo Medical and Dental University.

19

### 20 **Fertility analysis of transgenic female mice**

21 The fertility of Tg-A and Tg-S female mice, compared with wild type female mice, was  
22 assessed after they turned 6 weeks old by continuous mating with approximately 30-week old  
23 BDF1 male mice. Three female mice from each line were analyzed. The average number of  
24 offspring in the first litter and the aggregated number of offspring from all litters were  
25 calculated for each genotype.

26

## 1 **Real-time RT-PCR analysis**

2 RNA was extracted from 15.5 dpc or P0 mice gonads using QIAGEN RNeasy Mini kit  
3 according to manufacturer's instructions. Typically, 0.2 µg of total RNA was reverse  
4 transcribed using random hexamers (Promega) and SuperScript III reverse transcriptase  
5 (Invitrogen). Quantitative real-time PCR (qRT-PCR) was conducted using a Light Cycler  
6 system (Roche Diagnostics, Basel, Switzerland) with the Light Cycler DNA master SYBR  
7 Green kit (Roche) for 45 cycles. Gene expression levels were analysed using the comparative  
8 cycle time (Ct) method. Primers used in these experiments are listed in Supplementary Table  
9 S1. *Rps29* (Ribosomal protein S29) served as the housekeeping gene for normalization, as it  
10 shows minimum variability during fetal gonadal development [36].

11

## 12 **Histological analyses**

13 *Cryosections*: Gonadal samples were fixed overnight in 4% paraformaldehyde (PFA) at 4 °C.  
14 After washing three times with PBS, samples were incubated overnight in 20% sucrose/PBS  
15 at 4 °C. Samples were then incubated in 3/4 30% sucrose/OCT at 40 °C for 30 min and  
16 embedded.

17 *Paraffin-sections*: Gonadal samples were fixed overnight in 4% PFA at 4 °C and embedded in  
18 paraffin. The blocks were sectioned at 6-µm thickness and were later deparaffinised as  
19 previously described [43].

20

21 **Hematoxylin and Eosin (HE) stain**: After staining with 2× Haematoxylin for 4 min, the  
22 sections were washed for 12 min under running water and then stained with 1.0% Eosin for 2  
23 min.

24

25 **Immunofluorescence (IF)**: We employed cryosections and paraffin sections for IF. For cryo-  
26 sections, 8 µm of samples were washed twice with PBS and activated with citric acid solution.



1 The sections were blocked with 5% BSA-PBS at room temperature for 1 h, followed by  
2 overnight incubation with primary antibody at 4 °C. Next, the sections were washed twice  
3 with PBS-T, incubated with secondary antibody at room temperature for 1.5 h, and again  
4 washed twice with PBS-T. Finally, the sections were incubated with DAPI (1:1000; Dojindo)  
5 for 5 min, washed once with PBS-T, and mounted in Fluoromount™. The information of  
6 antibodies used in this study was indicated in Supplementary Table S2.

7

#### 8 **Counting numbers of follicles, apoptotic follicles, or multi-oocyte follicles (MOFs):**

9 Counting was performed as previously described [31]. Briefly, serial sections (6- $\mu$ m thick)  
10 from a whole ovary were placed on 5 slides, each slide containing sequential slices at every  
11 30  $\mu$ m interval (6  $\mu$ m \* 5 slides). Multi-oocytic follicles were defined as follicles containing  
12 more than a single oocyte. Anti-MVH antibody (ab13840, Abcam) and DAB staining (25985-  
13 50, Nacalai Tesque Inc.) was used to count the number of follicles and MOFs. The types of  
14 follicles were classified according to previous reports [44, 45]. We used anti-Cleaved Caspase  
15 3 (Cell signaling technology, Cat No. 9579) to identify apoptotic granulosa cells and  
16 calculated the percentage of Caspase 3-positive follicles.

17

#### 18 **Hormone measurements**

19 Free testosterone and estradiol levels of P0 mice were measured using commercially available  
20 ELISA kits (IBL International (DB52181) and Cayman Chemical (582251)). Three sets of  
21 plasma samples obtained from each of 5 mice were analyzed according to the manufacturer's  
22 protocol.

23

#### 24 **Preparation and administration of the Notch agonist HMN2-29**

25 BDF1 eggs were fertilized *in vitro* with Tg-A sperm and transplanted into the oviducts of ICR  
26 mice. The Notch2 agonist HMN2-29, a hamster monoclonal antibody, was prepared as

1 described previously [33]. Three doses of 0.5 mg of HMN2-29 or control hamster IgG (Wako,  
2 Cat No. 145-19561) were intraperitoneally injected into pregnant ICR mice at 13.5, 16.5 and  
3 18.5 dpc.

4

#### 5 **Statistical analysis**

6 We used the unpaired *t*-test (Welch's test) to determine statistically significant differences  
7 between the test and the control group.

8

9

1 **Disclosure statement**

2 The author declares no conflict of interest associated with this research.

3

4 **Data availability.**

5 Authors can confirm that all relevant data are included in the paper and/ or its supplementary  
6 information files

7

8 **Acknowledgements**

9 This study was partially supported by the grant, KAKENHI, Kiban (C) (15K09615) funded  
10 by Japan Society for the Promotion of Science (JSPS), for K.K. The funders had no role in  
11 study design, data collection and analysis, decision to publish, or preparation of the  
12 manuscript.

13

14 **Author Contributions**

15 KK, RN, HS, YK, MKA, TM contributed to the conception and the design of the present  
16 study. Acquisition of data, analysis and interpretation of data were performed by RN, HS and  
17 KK. The manuscript was drafted by KK, TM and RN, and critically revised by LZ, JB and PK.  
18 HS, LZ, JB, PK, MT, MKA and HY provided the materials for the present study, including  
19 Piggy BAC construct and Notch agonist. All experiments were performed by RN, HS, LZ,  
20 KK and AHT. All authors approved the final version to be published

21

1 **Reference**

2

3 1. Ikeda Y, Takeda Y, Shikayama T, Mukai T, Hisano S, Morohashi KI. Comparative  
4 localization of Dax-1 and Ad4BP/SF-1 during development of the hypothalamic-pituitary-  
5 gonadal axis suggests their closely related and distinct functions. *Dev Dyn*. 2001;220(4):363-  
6 76. doi: 10.1002/dvdy.1116. PubMed PMID: 11307169.

7 2. Luo X, Ikeda Y, Parker KL. A cell-specific nuclear receptor is essential for adrenal  
8 and gonadal development and sexual differentiation. *Cell*. 1994;77(4):481-90. PubMed  
9 PMID: 8187173.

10 3. Majdic G, Young M, Gomez-Sanchez E, Anderson P, Szczepaniak LS, Dobbins RL,  
11 et al. Knockout mice lacking steroidogenic factor 1 are a novel genetic model of  
12 hypothalamic obesity. *Endocrinology*. 2002;143(2):607-14. doi: 10.1210/endo.143.2.8652.  
13 PubMed PMID: 11796516.

14 4. Hanley NA, Ball SG, Clement-Jones M, Hagan DM, Strachan T, Lindsay S, et al.  
15 Expression of steroidogenic factor 1 and Wilms' tumour 1 during early human gonadal  
16 development and sex determination. *Mech Dev*. 1999;87(1-2):175-80. PubMed PMID:  
17 10495282.

18 5. Sekido R, Lovell-Badge R. Sex determination involves synergistic action of SRY and  
19 SF1 on a specific Sox9 enhancer. *Nature*. 2008;453(7197):930-4. Epub 2008/05/04. doi:  
20 10.1038/nature06944. PubMed PMID: 18454134.

21 6. Buaas FW, Gardiner JR, Clayton S, Val P, Swain A. In vivo evidence for the crucial  
22 role of SF1 in steroid-producing cells of the testis, ovary and adrenal gland. *Development*.  
23 2012;139(24):4561-70. Epub 2012/11/07. doi: 10.1242/dev.087247. PubMed PMID:  
24 23136395; PubMed Central PMCID: PMC3509722.

- 1 7. Achermann JC, Ito M, Hindmarsh PC, Jameson JL. A mutation in the gene encoding  
2 steroidogenic factor-1 causes XY sex reversal and adrenal failure in humans. *Nat Genet.*  
3 1999;22(2):125-6. doi: 10.1038/9629. PubMed PMID: 10369247.
- 4 8. Correa RV, Domenice S, Bingham NC, Billerbeck AE, Rainey WE, Parker KL, et al.  
5 A microdeletion in the ligand binding domain of human steroidogenic factor 1 causes XY sex  
6 reversal without adrenal insufficiency. *J Clin Endocrinol Metab.* 2004;89(4):1767-72. doi:  
7 10.1210/jc.2003-031240. PubMed PMID: 15070943.
- 8 9. Mallet D, Bretones P, Michel-Calemard L, Dijoud F, David M, Morel Y. Gonadal  
9 dysgenesis without adrenal insufficiency in a 46, XY patient heterozygous for the nonsense  
10 C16X mutation: a case of SF1 haploinsufficiency. *J Clin Endocrinol Metab.*  
11 2004;89(10):4829-32. doi: 10.1210/jc.2004-0670. PubMed PMID: 15472171.
- 12 10. Hasegawa T, Fukami M, Sato N, Katsumata N, Sasaki G, Fukutani K, et al. Testicular  
13 dysgenesis without adrenal insufficiency in a 46,XY patient with a heterozygous inactive  
14 mutation of steroidogenic factor-1. *J Clin Endocrinol Metab.* 2004;89(12):5930-5. doi:  
15 10.1210/jc.2004-0935. PubMed PMID: 15579739.
- 16 11. Takasawa K, Kashimada K, Pelosi E, Takagi M, Morio T, Asahara H, et al. FOXL2  
17 transcriptionally represses Sfl expression by antagonizing WT1 during ovarian development  
18 in mice. *FASEB journal : official publication of the Federation of American Societies for*  
19 *Experimental Biology.* 2014;28(5):2020-8. Epub 2014/01/24. doi: 10.1096/fj.13-246108.  
20 PubMed PMID: 24451388; PubMed Central PMCID: PMC3986836.
- 21 12. Bashamboo A, Donohoue PA, Vilain E, Rojo S, Calvel P, Seneviratne SN, et al. A  
22 recurrent p.Arg92Trp variant in steroidogenic factor-1 (NR5A1) can act as a molecular switch  
23 in human sex development. *Hum Mol Genet.* 2016;25(23):5286. doi: 10.1093/hmg/ddw390.  
24 PubMed PMID: 28031288.
- 25 13. Mami M, Masafumi I, Maki I, Yuko K-F, Kei T, Akiko H, et al. The p.R92W variant  
26 of NR5A1/Nr5a1

- 1 induces testicular development of 46,XX  
2 gonads in humans, but not in mice:  
3 phenotypic comparison of human patients  
4 and mutation-induced mice. In: Masafumi I, editor. *Biology of Sex Differences: BioMed*  
5 *Central*; 2016.
- 6 14. Baetens D, Hans S, Frank P, Anne-Laure T, Toon R, Frauke C, et al. NR5A1 is a  
7 novel disease gene for 46,XX testicular and ovotesticular disorders of sex development. In:  
8 Hans S, editor. *Genetics in Medicine* 2016.
- 9 15. Swartz JM, Ciarlo R, Guo MH, Abrha A, Weaver B, Diamond DA, et al. A 46,XX  
10 Ovotesticular Disorder of Sex Development Likely Caused by a Steroidogenic Factor-1  
11 (NR5A1) Variant. *Horm Res Paediatr.* 2017;87(3):191-5. Epub 2016/11/18. doi:  
12 10.1159/000452888. PubMed PMID: 27855412; PubMed Central PMCID:  
13 PMC5388569.
- 14 16. Igarashi M, Takasawa K, Hakoda A, Kanno J, Takada S, Miyado M, et al. Identical  
15 NR5A1 Missense Mutations in Two Unrelated 46,XX Individuals with Testicular Tissues.  
16 *Hum Mutat.* 2017;38(1):39-42. Epub 2016/09/21. doi: 10.1002/humu.23116. PubMed PMID:  
17 27610946.
- 18 17. Swain A, Narvaez V, Burgoyne P, Camerino G, Lovell-Badge R. Dax1 antagonizes  
19 Sry action in mammalian sex determination. *Nature.* 1998;391(6669):761-7. doi:  
20 10.1038/35799. PubMed PMID: 9486644.
- 21 18. Zhao L, Ng ET, Koopman P. A piggyBac transposon- and gateway-enhanced system  
22 for efficient BAC transgenesis. *Dev Dyn.* 2014;243(9):1086-94. Epub 2014/06/25. doi:  
23 10.1002/dvdy.24153. PubMed PMID: 24924516.
- 24 19. Raymond RR, Ann FM, Nishi KP, Patricia KM, Mark SH, Bryan WR. Expression of  
25 the Films' Tumor Suppressor Gene Wt1 during Mouse Embryogenesis. *Cell Growth and*  
26 *Differentiation*, 1993.

- 1 20. Maatouk DM, Mork L, Hinson A, Kobayashi A, McMahon AP, Capel B. Germ cells  
2 are not required to establish the female pathway in mouse fetal gonads. PLoS One.  
3 2012;7(10):e47238. Epub 2012/10/16. doi: 10.1371/journal.pone.0047238. PubMed PMID:  
4 23091613; PubMed Central PMCID: PMC3473035.
- 5 21. Bandiera R, Sacco S, Vidal VP, Chaboissier MC, Schedl A. Steroidogenic organ  
6 development and homeostasis: A WT1-centric view. Mol Cell Endocrinol. 2015;408:145-55.  
7 Epub 2015/01/14. doi: 10.1016/j.mce.2015.01.009. PubMed PMID: 25596547.
- 8 22. Zhao L, Arsenault M, Ng ET, Longmuss E, Chau TC, Hartwig S, et al. SOX4  
9 regulates gonad morphogenesis and promotes male germ cell differentiation in mice. Dev  
10 Biol. 2017;423(1):46-56. doi: 10.1016/j.ydbio.2017.01.013. PubMed PMID: 28118982.
- 11 23. McClelland KS, Bell K, Larney C, Harley VR, Sinclair AH, Oshlack A, et al.  
12 Purification and Transcriptomic Analysis of Mouse Fetal Leydig Cells Reveals Candidate  
13 Genes for Specification of Gonadal Steroidogenic Cells. Biol Reprod. 2015;92(6):145. Epub  
14 2015/04/08. doi: 10.1095/biolreprod.115.128918. PubMed PMID: 25855264.
- 15 24. Shima Y, Miyabayashi K, Haraguchi S, Arakawa T, Otake H, Baba T, et al.  
16 Contribution of Leydig and Sertoli cells to testosterone production in mouse fetal testes. Mol  
17 Endocrinol. 2013;27(1):63-73. Epub 2012/11/02. doi: 10.1210/me.2012-1256. PubMed  
18 PMID: 23125070; PubMed Central PMCID: PMC3473035.
- 19 25. Dagmar W, Christoph E. The Wilms tumor suppressor WT1  
20 regulates early gonad development  
21 by activation of Sfl. Gene and Development, 2002.
- 22 26. Suzuki H, Kanai-Azuma M, Kanai Y. From Sex Determination to Initial  
23 Folliculogenesis in Mammalian Ovaries: Morphogenetic Waves along the Anteroposterior  
24 and Dorsoventral Axes. Sex Dev. 2015;9(4):190-204. Epub 2015/09/25. doi:  
25 10.1159/000440689. PubMed PMID: 26401661.

- 1 27. Wilhelm D, Palmer S, Koopman P. Sex determination and gonadal development in  
2 mammals. *Physiol Rev.* 2007;87(1):1-28. doi: 10.1152/physrev.00009.2006. PubMed PMID:  
3 17237341.
- 4 28. Peng L, Arensburg J, Orly J, Payne AH. The murine 3beta-hydroxysteroid  
5 dehydrogenase (3beta-HSD) gene family: a postulated role for 3beta-HSD VI during early  
6 pregnancy. *Mol Cell Endocrinol.* 2002;187(1-2):213-21. PubMed PMID: 11988330.
- 7 29. Vanorny DA, Prasasya RD, Chalpe AJ, Kilen SM, Mayo KE. Notch signaling  
8 regulates ovarian follicle formation and coordinates follicular growth. *Mol Endocrinol.*  
9 2014;28(4):499-511. Epub 2014/02/19. doi: 10.1210/me.2013-1288. PubMed PMID:  
10 24552588; PubMed Central PMCID: PMC3968400.
- 11 30. Terauchi KJ, Shigeta Y, Iguchi T, Sato T. Role of Notch signaling in granulosa cell  
12 proliferation and polyovular follicle induction during folliculogenesis in mouse ovary. *Cell*  
13 *Tissue Res.* 2016;365(1):197-208. Epub 2016/02/22. doi: 10.1007/s00441-016-2371-4.  
14 PubMed PMID: 26899251.
- 15 31. Xu J, Gridley T. Notch2 is required in somatic cells for breakdown of ovarian germ-  
16 cell nests and formation of primordial follicles. *BMC Biol.* 2013;11:13. Epub 2013/02/13.  
17 doi: 10.1186/1741-7007-11-13. PubMed PMID: 23406467; PubMed Central PMCID:  
18 PMC3606475.
- 19 32. Guruharsha KG, Kankel MW, Artavanis-Tsakonas S. The Notch signalling system:  
20 recent insights into the complexity of a conserved pathway. *Nat Rev Genet.* 2012;13(9):654-  
21 66. Epub 2012/08/07. doi: 10.1038/nrg3272. PubMed PMID: 22868267; PubMed Central  
22 PMCID: PMC369923.
- 23 33. Tanaka E, Asanuma K, Kim E, Sasaki Y, Oliva Trejo JA, Seki T, et al. Notch2  
24 activation ameliorates nephrosis. *Nat Commun.* 2014;5:3296. doi: 10.1038/ncomms4296.  
25 PubMed PMID: 24526233.



- 1 34. Zanaria E, Muscatelli F, Bardoni B, Strom TM, Guioli S, Guo W, et al. An unusual  
2 member of the nuclear hormone receptor superfamily responsible for X-linked adrenal  
3 hypoplasia congenita. *Nature*. 1994;372(6507):635-41. doi: 10.1038/372635a0. PubMed  
4 PMID: 7990953.
- 5 35. Ludbrook LM, Bernard P, Bagheri-Fam S, Ryan J, Sekido R, Wilhelm D, et al. Excess  
6 DAX1 leads to XY ovotesticular disorder of sex development (DSD) in mice by inhibiting  
7 steroidogenic factor-1 (SF1) activation of the testis enhancer of SRY-box-9 (Sox9).  
8 *Endocrinology*. 2012;153(4):1948-58. Epub 2012/01/31. doi: 10.1210/en.2011-1428. PubMed  
9 PMID: 22294746.
- 10 36. Svingen T, Spiller CM, Kashimada K, Harley VR, Koopman P. Identification of  
11 suitable normalizing genes for quantitative real-time RT-PCR analysis of gene expression in  
12 fetal mouse gonads. *Sexual development : genetics, molecular biology, evolution,*  
13 *endocrinology, embryology, and pathology of sex determination and differentiation.*  
14 2009;3(4):194-204. Epub 2009/09/16. doi: 10.1159/000228720. PubMed PMID: 19752599.
- 15 37. Tang H, Brennan J, Karl J, Hamada Y, Raetzman L, Capel B. Notch signaling  
16 maintains Leydig progenitor cells in the mouse testis. *Development*. 2008;135(22):3745-53.
- 17 38. Inoue M, Shima Y, Miyabayashi K, Tokunaga K, Sato T, Baba T, et al. Isolation and  
18 Characterization of Fetal Leydig Progenitor Cells of Male Mice. *Endocrinology*.  
19 2016;157(3):1222-33. Epub 2015/12/23. doi: 10.1210/en.2015-1773. PubMed PMID:  
20 26697723.
- 21 39. O'Shaughnessy PJ, Baker PJ, Heikkilä M, Vainio S, McMahon AP. Localization of  
22 17beta-hydroxysteroid dehydrogenase/17-ketosteroid reductase isoform expression in the  
23 developing mouse testis--androstenedione is the major androgen secreted by fetal/neonatal  
24 leydig cells. *Endocrinology*. 2000;141(7):2631-7. doi: 10.1210/endo.141.7.7545. PubMed  
25 PMID: 10875268.

- 1 40. Hinshelwood MM, Shelton JM, Richardson JA, Mendelson CR. Temporal and spatial  
2 expression of liver receptor homologue-1 (LRH-1) during embryogenesis suggests a potential  
3 role in gonadal development. *Dev Dyn*. 2005;234(1):159-68. doi: 10.1002/dvdy.20490.  
4 PubMed PMID: 16003771.
- 5 41. Combes AN, Spiller CM, Harley VR, Sinclair AH, Dunwoodie SL, Wilhelm D, et al.  
6 Gonadal defects in Cited2-mutant mice indicate a role for SF1 in both testis and ovary  
7 differentiation. *Int J Dev Biol*. 2010;54(4):683-9. Epub 2009/09/17. doi: 092920ac [pii]  
8 10.1387/ijdb.092920ac. PubMed PMID: 19757380.
- 9 42. Lourenço D, Brauner R, Lin L, De Perdigo A, Weryha G, Muresan M, et al. Mutations  
10 in NR5A1 associated with ovarian insufficiency. *N Engl J Med*. 2009;360(12):1200-10. Epub  
11 2009/02/25. doi: 10.1056/NEJMoa0806228. PubMed PMID: 19246354; PubMed Central  
12 PMCID: PMCPMC2778147.
- 13 43. Suzuki H, Saba R, Sada A, Saga Y. The Nanos3-3'UTR is required for germ cell  
14 specific NANOS3 expression in mouse embryos. *PLoS One*. 2010;5(2):e9300. Epub  
15 2010/02/18. doi: 10.1371/journal.pone.0009300. PubMed PMID: 20174582; PubMed Central  
16 PMCID: PMCPMC2823788.
- 17 44. Myers M, Britt KL, Wreford NG, Ebling FJ, Kerr JB. Methods for quantifying  
18 follicular numbers within the mouse ovary. *Reproduction*. 2004;127(5):569-80. doi:  
19 10.1530/rep.1.00095. PubMed PMID: 15129012.
- 20 45. Torben P, Hannah P. Proposal for a classification of oocytes and follicles in the mouse  
21 ovary. *Journal of Reproduction and Fertility*, 1968.

22

23

24

25

26



1  
2  
3  
4  
5  
6  
7  
8  
9  
10  
11  
12  
13  
14  
15  
16  
17  
18  
19  
20  
21  
22  
23  
24  
25

## FIGURE LEGENDS

### **Figure 1: Generation of transgenic mice with enforced *Nr5a1* expression in XX gonads.**

(A) Schematic representation of the strategy to generate transgenic mice using the piggyBac-enabled *Wtl*-BAC system. *Nr5a1*-IRES-*Egfp* fragment in the Gateway entry vector was inserted into PBWt1-Dest using LR recombination. (B-M) Transgenic EGFP expression was detected using immunofluorescence in the XX fetal gonads at 15.5 dpc in both Tg-A and Tg-S lines. EGFP and NR5A1 were co-localized in XX transgenic gonads (K, L). (N) qRT-PCR analysis showing that *Nr5a1* was expressed at different levels in the XX fetal gonads of the Tg-A and Tg-S lines at P0. In the XX fetal gonads of the Tg-S line, *Nr5a1* was expressed at levels similar to that in wild-type testes. In the Tg-A line, *Nr5a1* was expressed in the XX fetal gonads at levels between those in wild-type testes and ovaries. Expression levels were normalized to *Rps29*. Mean  $\pm$  SD, n = 3.

### **Figure 2: Transgenic overexpression of *Nr5a1* in XX fetal gonads did not induce male development.**

(A–C) External genitalia of wild-type, Tg-A and Tg-S XX mice at 6–8 months old. XX mice in both transgenic lines developed female-type external genitalia. (D–F) Reproductive tracts of wild-type, Tg-A, and Tg-S XX mice at 6–8 months old. In the XX Tg-S mice, the uterine horn and ovaries were elongated compared to wild type (F). (G–J) Histological analysis of gonadal sections at 6-8 months using HE stain. XX gonads of both transgenic lines contained ovarian follicles but no seminiferous tubule-like structures. (K–V) Immunofluorescence analysis for markers of granulosa (FOXL2, in red) or Sertoli cells (SOX9, in green) in the fetal gonads in adult mice. In the XX gonads of the Tg-A and Tg-S lines, only FOXL2-

1 positive granulosa cells were present (L,M), and no SOX9-positive cells were detected (P, Q;  
2 some non-specific staining of the oocytes was seen using the anti-SOX9 antibody).

3

4 **Figure 3: Formation of ectopic steroidogenic cells in the XX transgenic fetal gonads.**

5 (A–L) Immunofluorescence analysis for 3 $\beta$ -HSD at 15.5dpc, a marker of steroidogenic cells.

6 In the Tg-S fetal ovaries, 3 $\beta$ -HSD positive cells were sparsely observed, some of which

7 showed co-localization with NR5A1 (G,K). (M, N) The plasma testosterone (M) or estradiol

8 (N) levels at P0. No significant increase in levels of testosterone or estradiol was observed in

9 XX Tg-A or Tg-S mice compared with wild-type female mice. Mean  $\pm$  SEM, n = 3. \* $p$  < 0.05

10 (Welch's  $t$ -test).

11

12 **Figure 4: Impaired ovarian development in *Nr5a1* transgenic mice.**

13 (A–C) Histological analysis of ovaries in the wild-type, Tg-A, and Tg-S females. Multi-

14 oocyte follicles (MOFs) were observed in Tg-A and Tg-S ovaries (arrowhead). (D) Numbers

15 of MOFs were counted from serial ovarian sections. Mean  $\pm$  SEM, n = 3. \* $p$  < 0.05 (Welch's

16 test). (E) The numbers of antral follicles (type 6–8) significantly decreased in transgenic mice.

17 The numbers of follicles of each type [1-2 (primordial), 3 (primary), 4-5 (secondary), 6-8

18 (antral), death and intact] were counted from serial ovarian sections. Mean  $\pm$  SD, n = 3. \* $p$  <

19 0.05 (Welch's  $t$ -test). (F) Quantitation of secondary follicles containing cleaved Caspase 3-

20 positive cells (G-I). The percentage of cleaved Caspase 3-positive follicles was plotted. Mean

21  $\pm$  SEM, n = 3. \* $p$  < 0.05, \*\* $p$  < 0.01 (Welch's  $t$ -test). (G–O) Immunofluorescence analysis for

22 markers of cell proliferation (Ki-67: red) or apoptosis (cleaved Caspase 3: green) in the XX

23 gonads of the wild-type, Tg-A and Tg-S mice. Yellow and white arrows indicate secondary

24 follicles (type 4–5) with or without cleaved Caspase 3-positive cells, respectively. (P)

25 Average litter size of the first mating of wild-type, Tg-A, and Tg-S female mice (n = 3). Mean

1  $\pm$  SEM. \* $p$  < 0.05 (Welch's  $t$ -test). (Q) Total number of progeny from wild-type, Tg-S and  
2 Tg-A female mice (n = 3).

3

#### 4 **Figure 5: Expression of the Notch signaling pathway genes in XX Tg-A mice.**

5 (A-H) qRT-PCR analysis was performed on total RNA extracted from fetal ovaries of wild-  
6 type, Tg-A, and Tg-S mice at 15.5 dpc. Expression levels were normalized to *Rps29*. Mean  $\pm$   
7 SEM, n = 3. \* $p$  < 0.05, \*\* $p$  < 0.01 (Welch's  $t$ -test).

8

#### 9 **Figure 6: Administration of a Notch2 agonist rescued the ovarian phenotype in Tg-A** 10 **mice.**

11 (A,B) The Notch2 agonist HMN2-29 or control hamster IgG was *in utero* administered to  
12 wild-type or Tg-A mice, and the ovarian phenotype was analyzed at P14 (A) and P28 (B).  
13 HMN2-29 administration almost completely rescued the formation of MOFs in the Tg-A  
14 ovaries at P14 (A), and restored the antral follicles to the wild-type level at P28 (B). Mean  $\pm$   
15 SEM, n = 3. \* $p$  < 0.05, \*\* $p$  < 0.01 (Welch's  $t$ -test). (C-O) Immunofluorescence analysis at  
16 P28 for markers of cell proliferation (Ki-67: red) or apoptosis (cleaved Caspase 3: green) in  
17 XX gonads of wild-type and Tg-A mice treated with hamster IgG or HMN2-29. White and  
18 yellow arrows indicate secondary follicles (type 4–5) with or without cleaved Caspase  
19 Caspase 3-positive granulosa cells, respectively. Quantitation of Caspase 3-positive follicles  
20 in (D-G) is shown in (C). Mean  $\pm$  SEM, n = 3. \*\* $p$  < 0.01 (Welch's  $t$ -test); ns, not significant.  
21 (P,Q) qRT-PCR analysis for *Foxl2* (P) and *Wnt4* (Q) in P0 gonads of wild-type or Tg-A mice  
22 treated with hamster IgG or HMN2-29, respectively. Expression levels were normalized to  
23 *Rps29*. Mean  $\pm$  SEM, n = 3. \* $p$  < 0.05, \*\* $p$  < 0.01 (Welch's  $t$ -test); ns, not significant.

24

- 1 **Figure 7: A model for NR5A1 function in fetal gonadal development in mice.** NR5A1
- 2 fine-tunes Notch signaling levels to achieve optimal developmental outcomes in both fetal
- 3 ovaries and testes.
- 4

1  
2  
3  
4  
5  
6  
7  
8  
9  
10  
11  
12  
13  
14  
15  
16  
17  
18  
19  
20  
21  
22  
23  
24  
25

**Supplementary Figure S1: Overexpression of *Nr5a1* affected the morphology of fetal ovaries in the Tg-A mice.**

(A,B) Bright-field images of 15.5 dpc-ovaries from Tg-A and wild-type mice. (C,D) Scatter plot measuring the length or width of the fetal ovaries.  $*p < 0.05$  (Welch's *t*-test). (E) qRT-PCR analysis showing that *Sox4* was significantly down-regulated in Tg-A fetal ovaries compared with wild type ovaries at 15.5 dpc. Expression levels were normalized to *Rps29*. Mean  $\pm$  SEM,  $n = 3$ .  $*p < 0.05$  (Welch's *t*-test).

**Supplementary Figure S2: *In utero* administration of the Notch2 agonist did not affect body weight.**

(A) Schematics showing the experimental design. The Notch2 agonist HMN2-29 was administered *in utero* at 13.5, 16.5 and 18.5 dpc via i.p. injection. Hamster IgG was used as the mock control. (B) *In utero* treatment of HMN2-29 did not cause a significant change in mouse body weight at P28. ns, not significant (Welch's *t*-test).

**Supplementary Table S1**

The list of primer sets used in this study

**Supplementary Table S2**

The details of antibodies used in this study





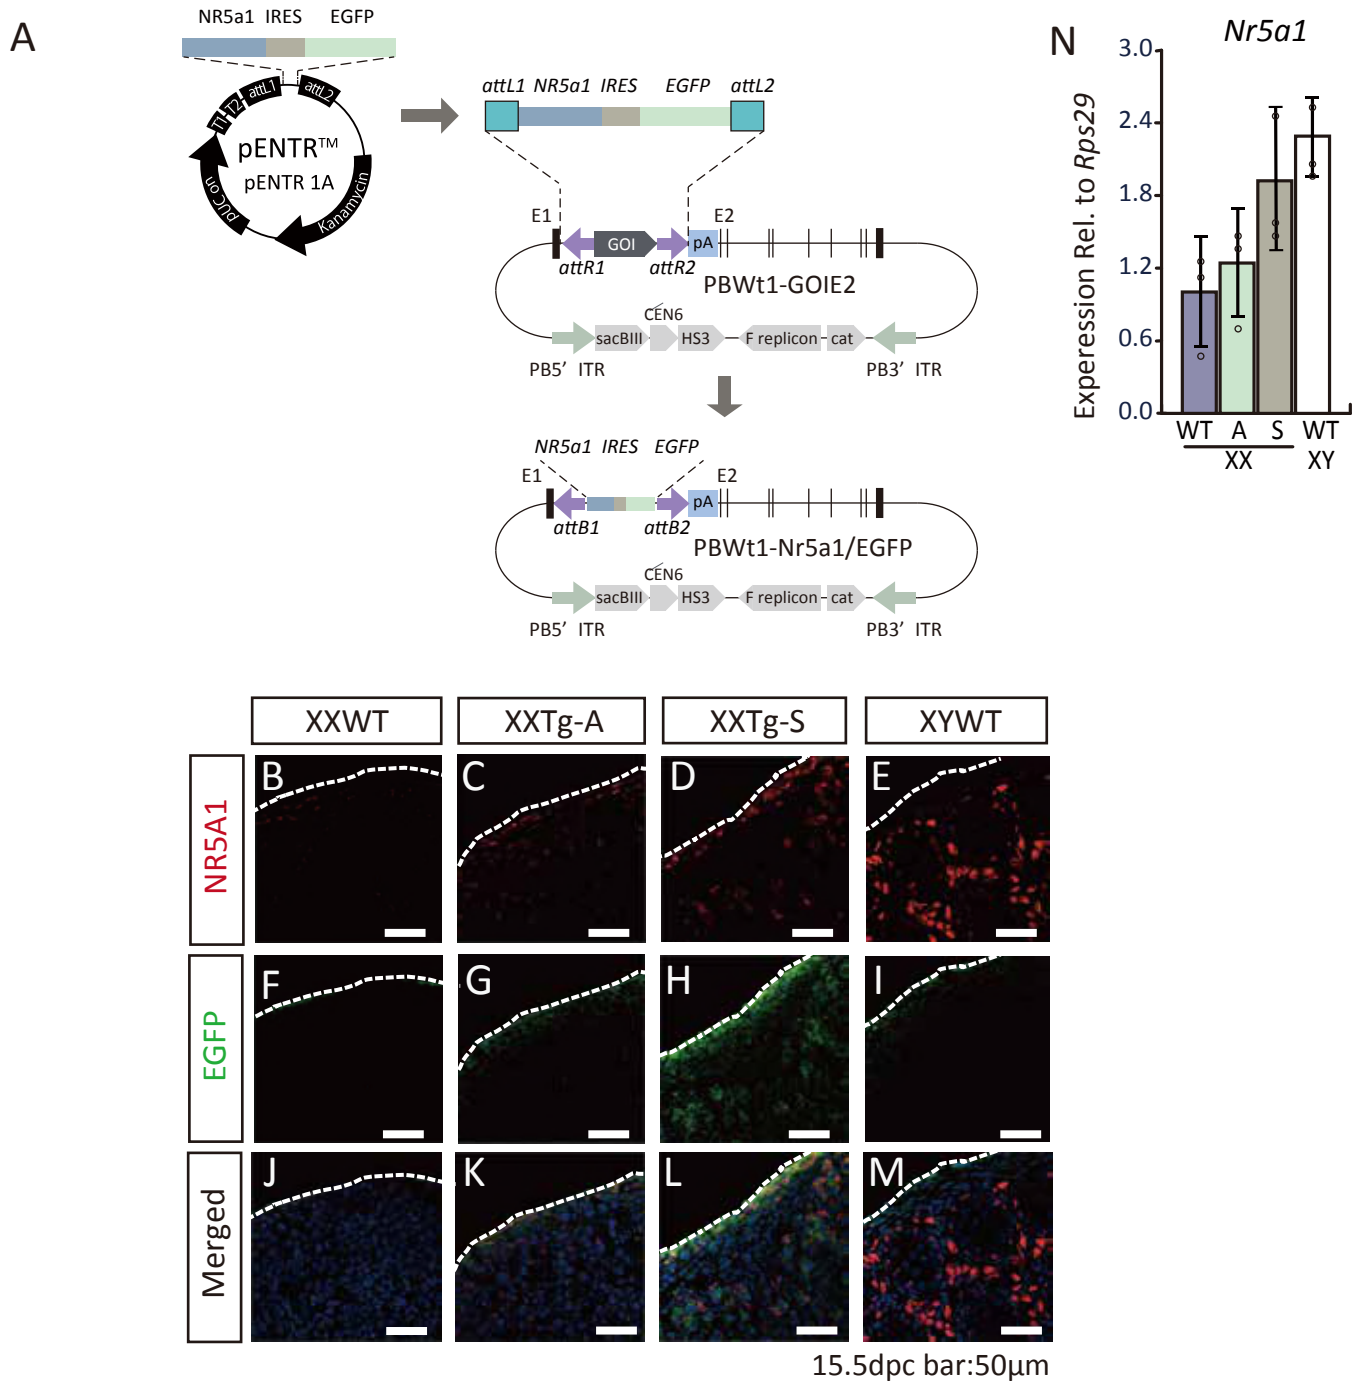

Figure 1

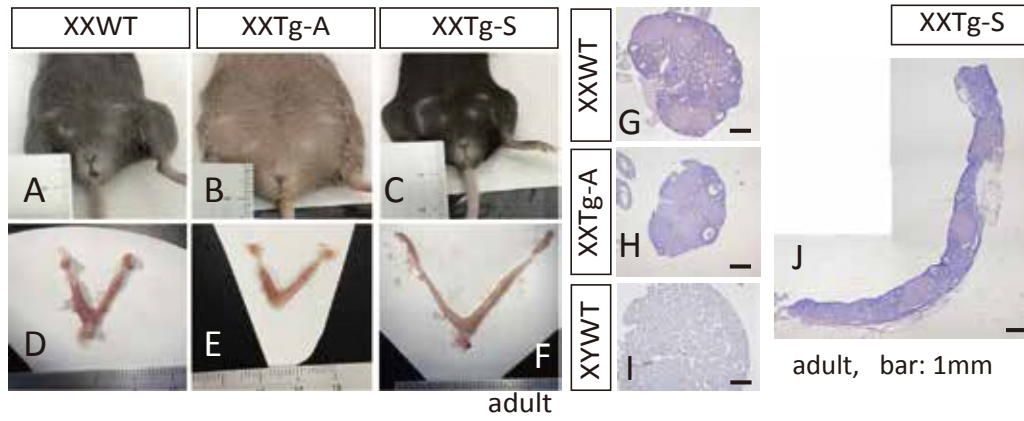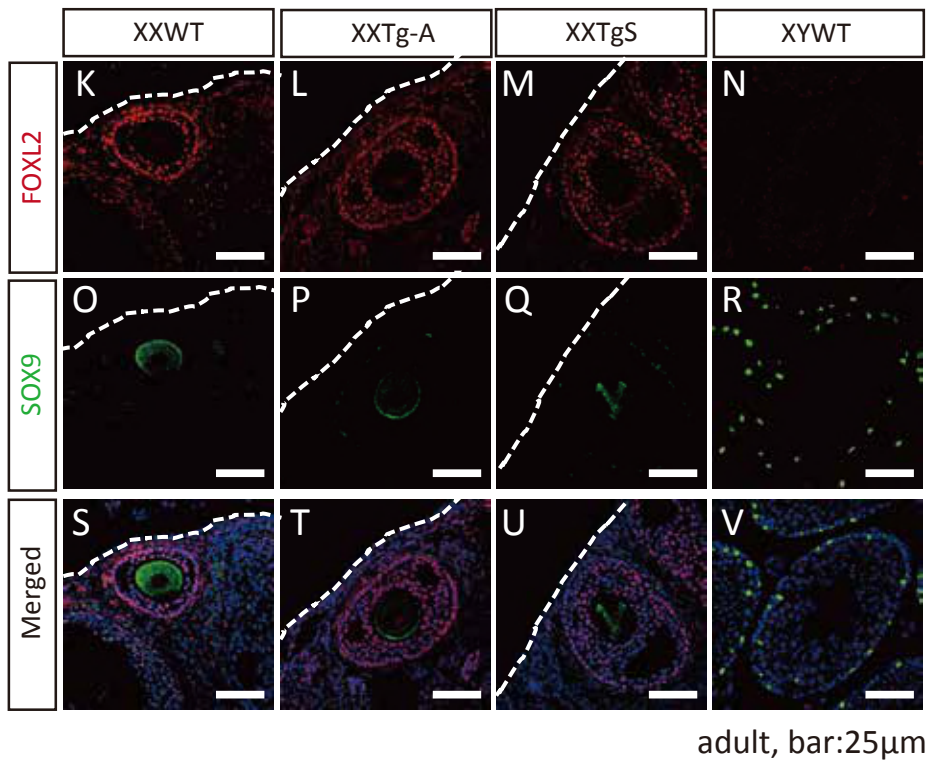

Figure 2

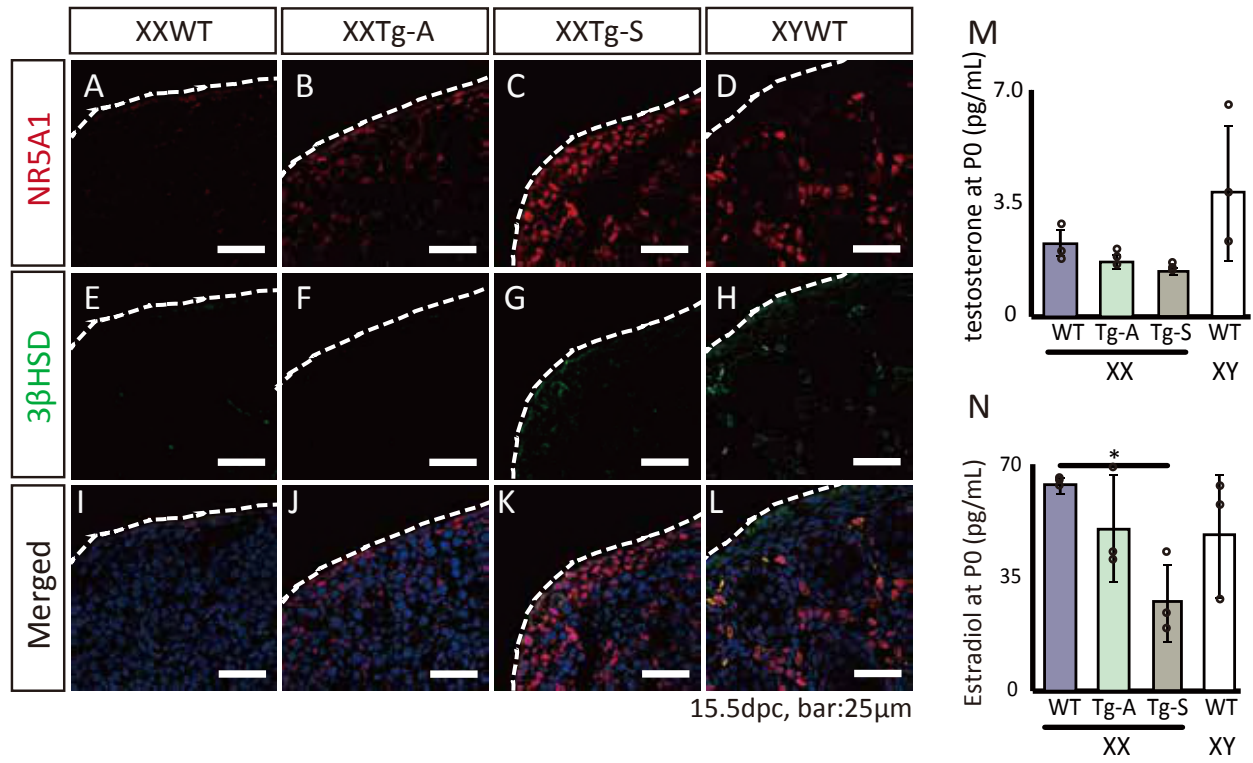

Figure 3

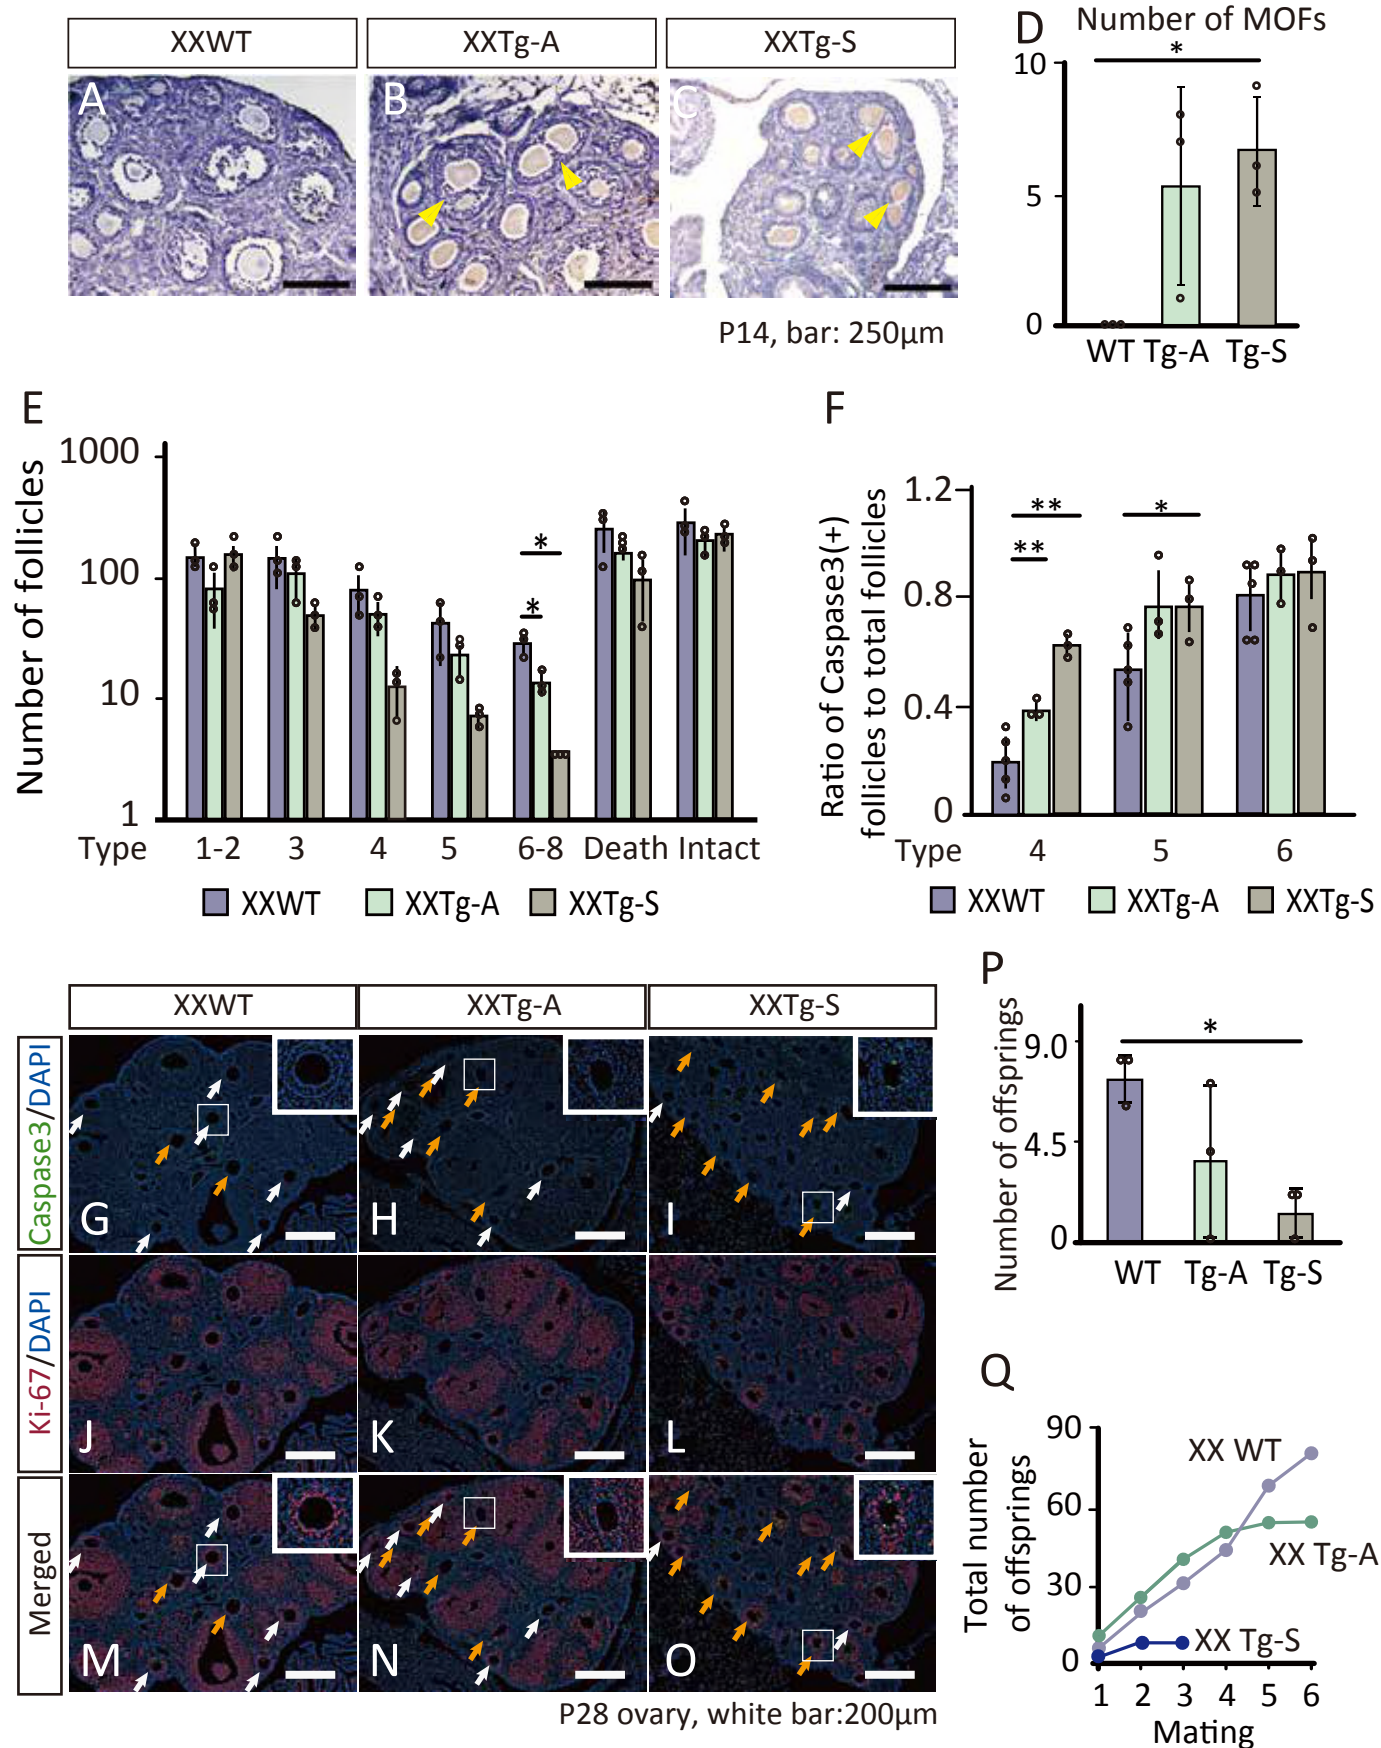

Figure 4

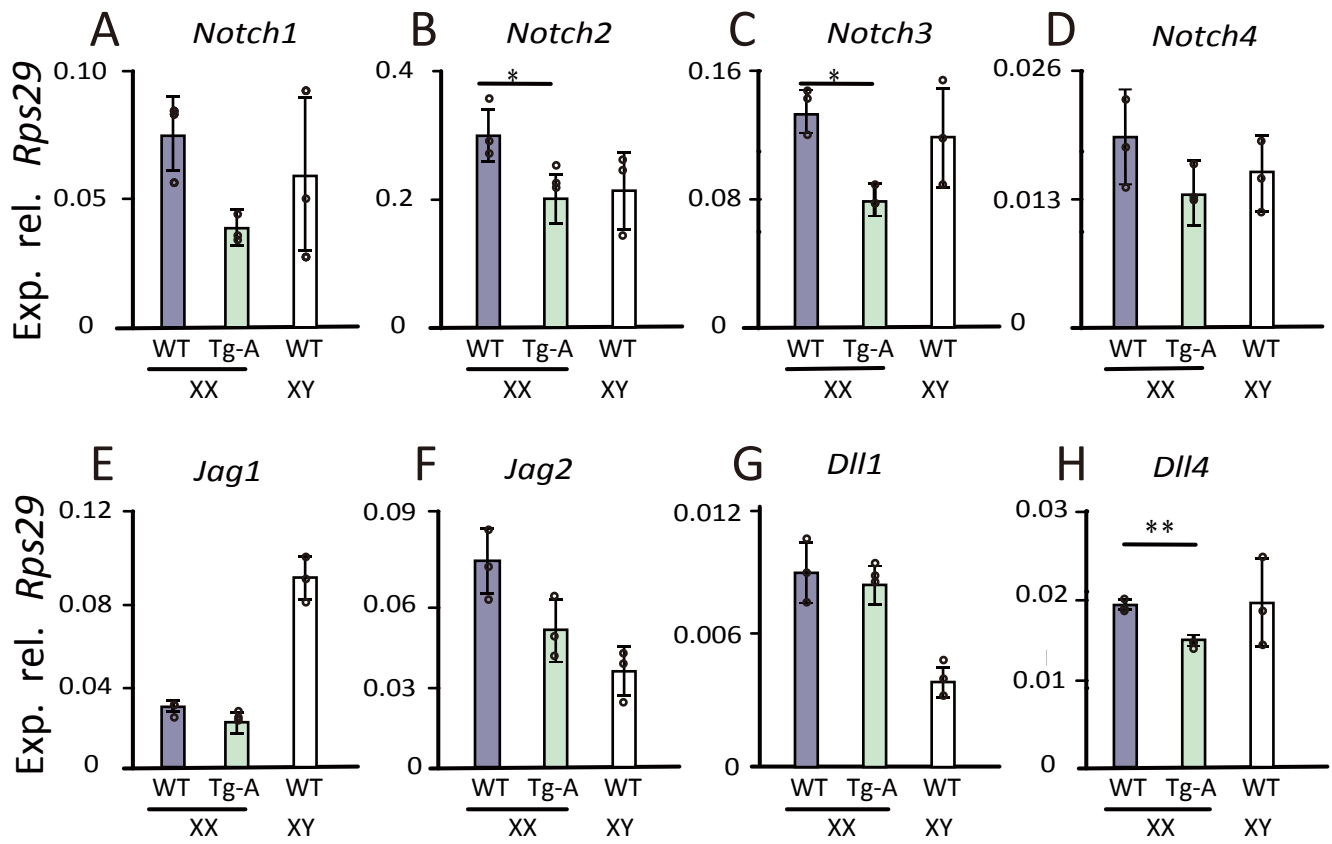

Figure 5



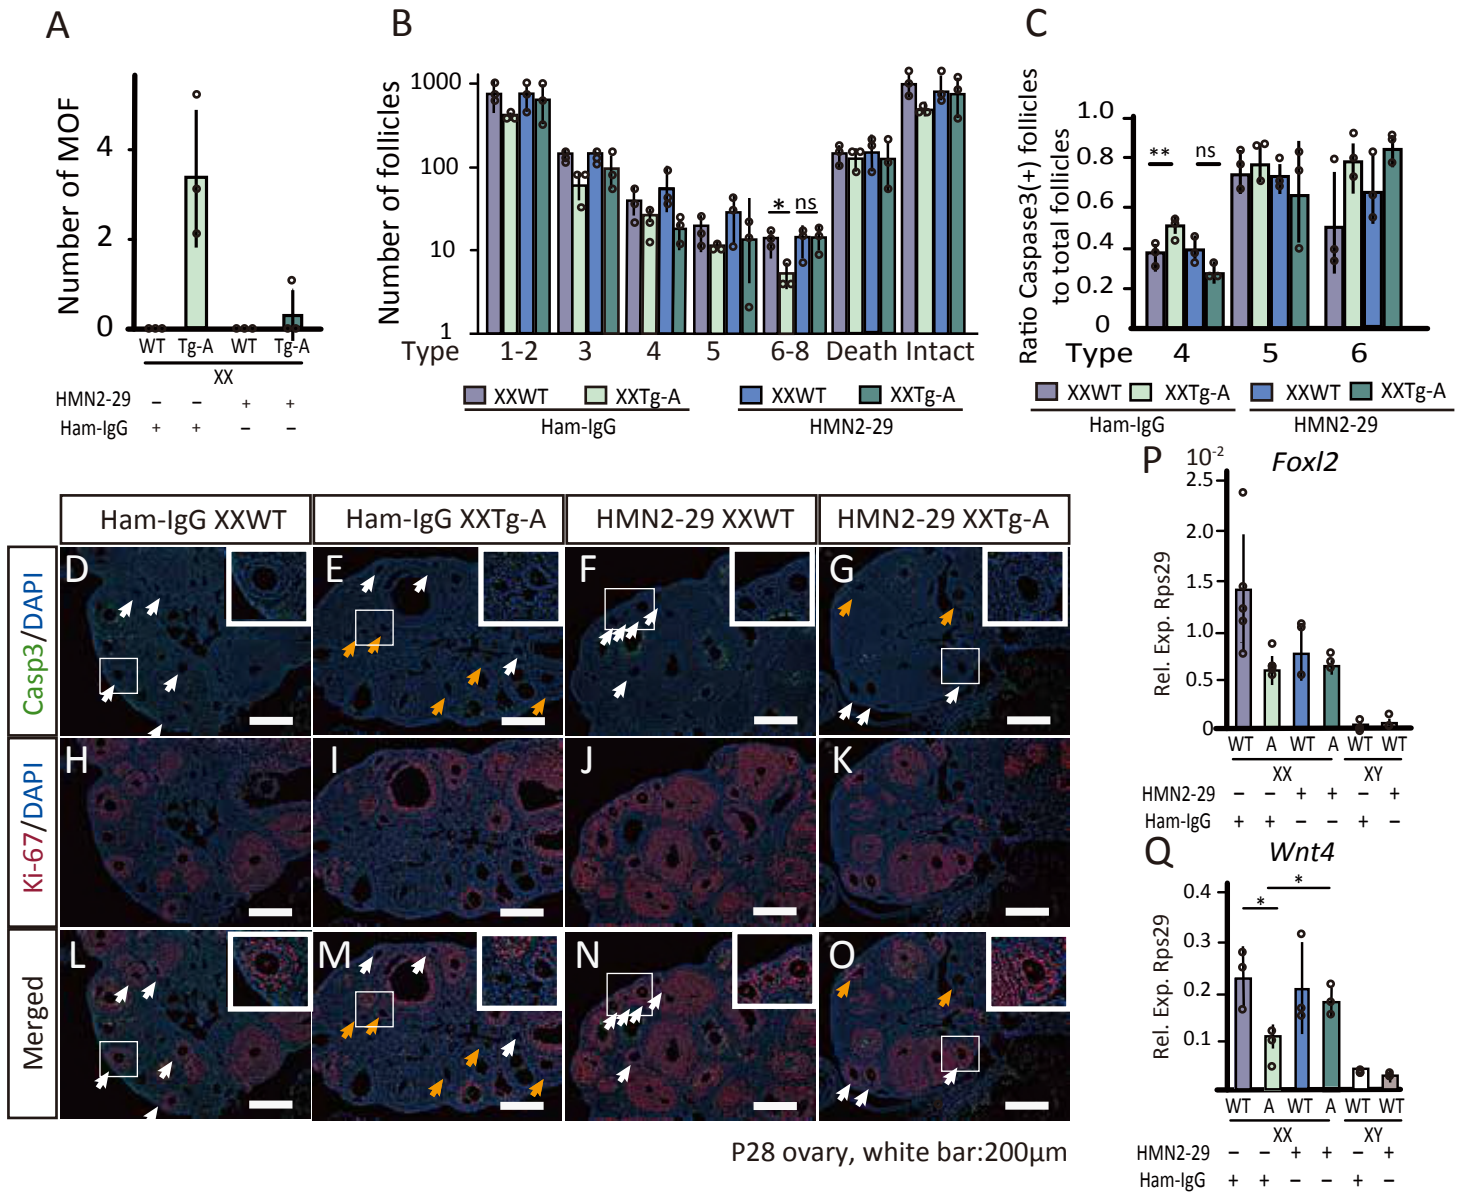

Figure 6

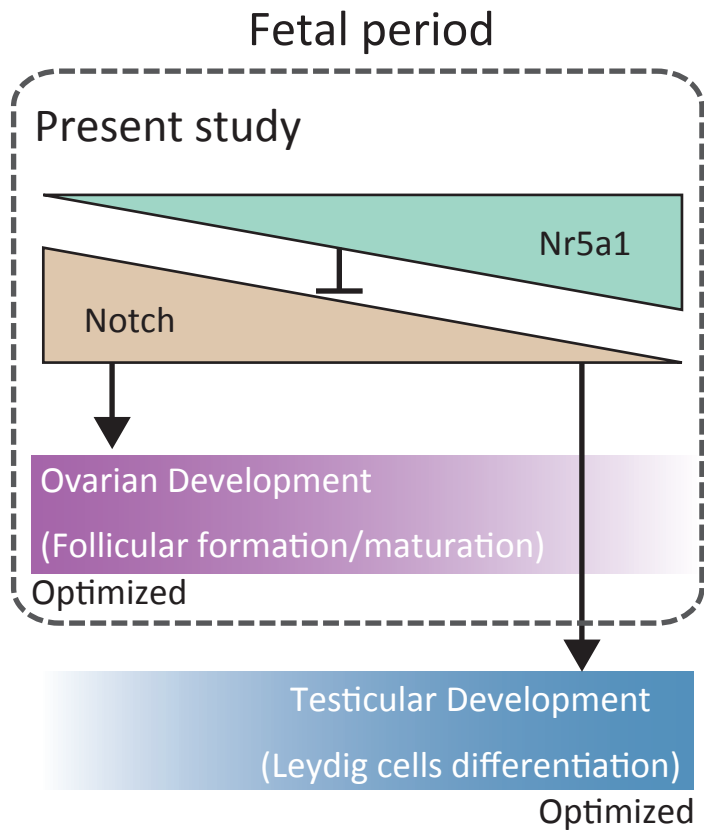

Figure 7
